# Supplementary material for: Why an Antioxidant Complex Twendee X® Prevent Dementia?
Source: Preprints.org preprint supplement (doi:10.20944/preprints202307.2112.v1), 2023-08-01
Supplement: Supplementary file 1 [file supplementary]

## Sheet: Table S1
Table S1. Relative area and comparative analysis of HepG2 metabolites near the glycolytic and TCA circuits
ID	HMT DB †				m/z	MT/RT	Relative Area										Comparative Analysis
	Compound name	Pathway Label	KEGG ID	HMDB ID			Control			TwX			Control		TwX		TwX vs Control
							Cont1	Cont2	Cont3	TWX1	TWX2	TWX3	Mean	S.D.	Mean	S.D.	Ratio ¶	p-value ||
A_0076	2,3-Diphosphoglyceric acid	Diphosphoglycerate	C01159	HMDB01294	264.951	17.8142	0.00456056	0.00504495	0.00723411	0.00822004	0.00978734	0.00681823	0.0056132	0.00142449	0.00827521	0.00148532	1.47424	0.088701
A_0026	2-Oxoglutaric acid	2-OG	C00026	HMDB00208	145.014	20.4734	0.120714	0.12527	0.127215	0.120053	0.126927	0.125077	0.1244	0.00333664	0.124019	0.00355688	0.996943	0.8991
A_0047	2-Phosphoglyceric acid	2-PG	C00631	HMDB03391	184.985	18.533	0.00305841	0.0033924	0.00300414	0.00423804	0.00338108	0.00399178	0.00315165	0.000210253	0.0038703	0.000441203	1.22802	0.088143
A_0006	3-Hydroxybutyric acid	3-HBA	C01089,C03197	HMDB00011,HMDB00357,HMDB00442	103.04	9.24885	0.00510337	0.00489414	0.00554903	0.0036781	0.0040138	0.00339141	0.00518218	0.000334483	0.00369444	0.000311516	0.712912	0.0049463	**
A_0046	3-Phosphoglyceric acid	3-PG	C00197	HMDB00807	184.985	18.9796	0.0146816	0.0138776	0.016029	0.0197872	0.0178268	0.0190128	0.0148627	0.00108709	0.0188756	0.000987379	1.27	0.0092906	**
A_0077	6-Phosphogluconic acid	6-PG	C00345	HMDB01316	275.016	14.1063	0.00264491	0.00267487	0.00267438	0.0245123	0.0230447	0.0208476	0.00266472	1.71557e-05	0.0228016	0.00184441	8.55684	0.0027828	**
A_0101	Acetyl CoA_divalent	AcCoA	C00024	HMDB01206	403.558	9.93777	N.D.	N.D.	N.D.	N.D.	0.000775079	N.D.	N.A.	N.A.	0.000775079	N.A.	1<	N.A.
A_0105	ADP	ADP	C00008	HMDB01341	426.021	10.5162	0.104317	0.0867753	0.0983684	0.115522	0.118636	0.121318	0.0964869	0.00892086	0.118492	0.00290094	1.22807	0.039985	*
C_0007	Ala	Ala	C00041,C00133,C01401	HMDB00161,HMDB01310	90.0551	9.73711	1.22305	1.17042	1.21332	0.970638	0.984575	1.00738	1.20226	0.0279989	0.987531	0.0185489	0.821394	0.00078738	***
C_0075	Arg	Arg	C00062,C00792	HMDB00517,HMDB03416	175.119	7.58795	0.520726	0.440175	0.399205	0.514359	0.504674	0.516066	0.453368	0.0618255	0.5117	0.00614403	1.12866	0.24305
C_0046	Asp	Asp	C00049,C00402,C16433	HMDB00191,HMDB06483	134.045	12.6305	1.01894	0.966925	1.01164	1.6242	1.56695	1.61708	0.999165	0.0281588	1.60274	0.0312028	1.60408	1.6945e-05	***
A_0116	ATP	ATP	C00002	HMDB00538	505.987	11.3967	0.531684	0.511087	0.536094	0.772626	0.749685	0.741199	0.526289	0.0133481	0.754503	0.0162578	1.43363	6.2067e-05	***
A_0040	cis-Aconitic acid	cis-Aconitic acid	C00417	HMDB00072	173.008	26.9797	0.0129133	0.012714	0.013182	0.00819506	0.00822928	0.00757375	0.0129364	0.000234855	0.00799936	0.000368986	0.61836	0.00013178	***
A_0052	Citric acid	Citric acid	C00158	HMDB00094	191.018	25.3256	0.263768	0.255962	0.284977	0.172302	0.168028	0.169719	0.268236	0.0150148	0.170016	0.0021527	0.633832	0.0067961	**
A_0124	CMP-N-acetylneuraminate	CMP-NeuNAc	C00128	HMDB01176	613.139	7.96116	0.00389444	0.00365592	0.00356008	0.00647986	0.00566084	0.00548427	0.00370348	0.000172179	0.00587499	0.000531223	1.58634	0.012797	*
A_0095	CoA_divalent	CoA	C00010	HMDB01423	382.55	10.2746	0.00745357	0.0070769	0.00688881	0.00711266	0.00684125	0.00495642	0.00713976	0.00028758	0.00630344	0.00117442	0.882865	0.34231
A_0035	Dihydroxyacetone phosphate	DHAP	C00111	HMDB01473	168.99	12.2013	0.00117435	0.00108741	0.00137258	0.00315771	0.00191595	0.00290403	0.00121145	0.000146161	0.00265923	0.00065608	2.19509	0.05603
A_0088	Fructose 1,6-diphosphate	F1,6P	C00354	HMDB01058	338.987	14.026	0.00621607	0.00502114	0.00528142	0.0223246	0.0244743	0.0232913	0.00550621	0.000628382	0.0233634	0.00107665	4.2431	8.6664e-05	***
A_0074	Fructose 6-phosphate	F6P	C05345,C00085	HMDB00124	259.023	9.65523	0.000718742	N.D.	0.00100483	0.00115734	0.00139	0.00100174	0.000861788	0.000202297	0.00118303	0.000195401	1.37276	0.20811
A_0009	Fumaric acid	Fumaric acid	C00122	HMDB00134	115.003	24.3474	0.0513705	0.0493779	0.0503263	0.0432588	0.0419669	0.0406177	0.0503582	0.000996682	0.0419478	0.00132066	0.832987	0.0012687	**
C_0060	Glu	Glu	C00025,C00217,C00302	HMDB00148,HMDB03339	148.061	11.8749	7.06246	6.69467	6.48944	9.05242	9.02134	9.18584	6.74886	0.290329	9.08653	0.087397	1.34638	0.0028146	**
A_0073	Glucose 1-phosphate	G1P	C00103	HMDB01586	259.022	9.76236	0.012596	0.0123885	0.0129869	0.0234632	0.0225939	0.0209927	0.0126571	0.000303812	0.0223499	0.00125322	1.7658	0.0037587	**
A_0071	Glucose 6-phosphate	G6P	C00668,C01172,C00092	HMDB01401	259.021	9.53105	0.0037531	0.00293998	0.00297479	0.00731873	0.00574982	0.00475067	0.00322262	0.000459736	0.00593974	0.00129452	1.84314	0.054935
A_0037	Glycerol 3-phosphate	G3P	C00093	HMDB00126	171.006	11.6915	0.0132546	0.0129822	0.0136412	0.0194458	0.0188827	0.0173314	0.0132927	0.000331132	0.0185533	0.001095	1.39575	0.0092863	**
A_0054	Isocitric acid	Isocitric acid	C00311	HMDB00193	191.019	27.6518	0.0060657	0.00648477	0.00705283	0.0034075	0.00341667	0.00369497	0.00653443	0.000495432	0.00350638	0.000163387	0.5366	0.0048834	**
A_0005	Lactic acid	Lactic acid	C00186,C00256,C01432	HMDB00190,HMDB01311	89.0243	10.4158	0.906163	0.829268	0.791312	0.721288	0.703593	0.65096	0.842248	0.0585153	0.691947	0.0365819	0.821548	0.026799	*
A_0021	Malic acid	Malic acid	C00149,C00497,C00711	HMDB00156,HMDB00744	133.014	20.4413	0.471969	0.47228	0.471264	0.40094	0.421079	0.37521	0.471838	0.000520973	0.399076	0.0229911	0.845792	0.031651	*
A_0080	N-Acetylglucosamine 1-phosphate	GlcNAc-P	C04256	HMDB01367	300.048	9.26073	0.00264491	0.00272726	0.002923	0.00248329	0.00295795	0.00316711	0.00276505	0.000142843	0.00286945	0.000350398	1.03776	0.66939
A_0082	N-Acetylneuraminic acid	NeuNAc	C00270	HMDB00230	308.098	7.04326	0.00154875	0.00126203	0.00128453	0.00189005	0.00183883	0.00190904	0.0013651	0.000159443	0.00187931	3.63135e-05	1.37668	0.02575	*
A_0125	NAD+	NAD+	C00003	HMDB00902	662.103	6.44483	0.0358379	0.0336716	0.0339503	0.0432671	0.0430584	0.0398419	0.0344866	0.00117852	0.0420558	0.00192013	1.21948	0.0075883	**
A_0127	NADH	NADH	C00004	HMDB01487	664.118	7.96631	0.00724155	0.00739598	0.00624482	0.00572634	0.00533262	0.00441845	0.00696078	0.000624833	0.00515914	0.000670986	0.741172	0.027404	*
A_0128	NADP+	NADP+	C00006	HMDB00217	742.071	9.11109	0.00287948	0.00237643	0.00268646	0.00457317	0.00448241	0.00413681	0.00264746	0.000253785	0.00439746	0.000230245	1.66101	0.00094109	***
A_0094	NADPH_divalent	NADPH	C00005	HMDB00221	371.536	10.9112	0.00364183	0.00330668	0.00412638	0.00358235	0.00337713	0.00336443	0.00369163	0.000412113	0.0034413	0.000122315	0.93219	0.40553
A_0033	Phosphoenolpyruvic acid	PEP	C00074	HMDB00263	166.974	20.3005	0.00850161	0.00951365	0.00804903	0.00878206	0.00875918	0.00833265	0.00868809	0.000749906	0.00862463	0.000253121	0.992695	0.90014
A_0096	PRPP	PRPP	C00119	HMDB00280	388.944	16.2206	0.0289527	0.029849	0.0350276	0.0225557	0.0222894	0.0191207	0.0312764	0.00327938	0.021322	0.00191095	0.681726	0.01715	*
A_0003	Pyruvic acid	Pyruvic acid	C00022	HMDB00243	87.0089	12.3957	0.0143418	0.0127505	0.0145166	0.014448	0.0164625	0.0158339	0.0138696	0.000973124	0.0155815	0.00103068	1.12343	0.10485
A_0066	Ribose 5-phosphate	R5P	C00117	HMDB01548	229.011	10.2167	0.00261183	0.00315904	0.00322514	0.00603441	0.00559559	0.00676933	0.00299867	0.000336638	0.00613311	0.00059306	2.04528	0.0033873	**
A_0067	Ribulose 5-phosphate	Ru5P	C00199,C01101	HMDB00618	229.011	10.5758	0.0047019	0.00516877	0.00550759	0.0160592	0.0162173	0.0148844	0.00512609	0.00040454	0.0157203	0.000728199	3.06673	0.00015532	***
A_0079	Sedoheptulose 7-phosphate	S7P	C05382	HMDB01068	289.032	9.41718	0.0191474	0.0180272	0.0183149	0.0330259	0.0333758	0.0329714	0.0184965	0.000581772	0.0331244	0.000219474	1.79084	0.00011453	***
A_0013	Succinic acid	Succinic acid	C00042	HMDB00254	117.019	20.156	0.0432809	0.0381879	0.0392904	0.0464519	0.0463485	0.0480987	0.0402531	0.0026795	0.0469663	0.000981973	1.16678	0.036694	*
A_0120	UDP-glucuronic acid	UDP-GlcA	C00167	HMDB00935	579.027	10.6524	0.0458401	0.0429249	0.0416574	0.0761493	0.0748544	0.0726379	0.0434742	0.00214476	0.0745472	0.00177576	1.71475	5.4518e-05	***
The ID consists of the initial letter of the measurement mode and a serial number. C: Cation mode, A: Anion mode, P: Positive mode, N: Negative mode.
TwX: Twendee X®
m/z: mass-to-charge ratio
MT/RT: Migration Time in CE-TOFMS; Retention Time in LC-TOFMS.
N.D.: Not Detected.
N.A.: Not Calculated due to Insufficient Data
† Indicates candidate compounds obtained by matching the m/z of detected peaks and MT or RT to the HMT database; FA indicates fatty acids; AC indicates acylcarnitines; numbers in parentheses indicate the number of carbons and double bonds.
¶ The ratio of the detection means between the two groups is calculated with the latter as the denominator.
|| The p-values of Welch's t-test and their ranges are shown. (*<0.05, **<0.01, ***<0.001)
